## **Morphogen dynamics control patterning in a stem cell model of the human embryo.**

Idse Heemskerk<sup>1</sup>, Kari Burt<sup>1</sup>, Matthew Miller<sup>1</sup>, Sapna Chhabra<sup>2</sup>, M. Cecilia Guerra<sup>1</sup>, Aryeh Warmflash<sup>1,3,\*</sup>

<sup>1</sup>Department of Biosciences, <sup>2</sup>Systems, Synthetic and Physical Biology Program, <sup>3</sup>Department of Bioengineering, Rice University, Houston TX 77005.

\*Correspondence to AW: [aryeh.warmflash@rice.edu](mailto:aryeh.warmflash@rice.edu)

**During embryonic development, diffusible signaling molecules called morphogens are thought to determine cell fates in a concentration-dependent manner<sup>1-4</sup>, and protocols for directed stem cell differentiation are based on this picture<sup>5-8</sup>. However, in the mammalian embryo, morphogen concentrations change rapidly compared to the time for making cell fate decisions<sup>9-12</sup>. It is unknown how changing ligand levels are interpreted, and whether the precise timecourse of ligand exposure plays a role in cell fate decisions. Nodal and BMP4 are morphogens crucial for gastrulation in vertebrates<sup>13</sup>. Each pathway has distinct receptor complexes that phosphorylate specific signal transducers, known as receptor-Smads, which then complex with the shared cofactor Smad4 to activate target genes<sup>14</sup>. Here we show in human embryonic stem cells (hESCs) that the response to BMP4 signaling indeed is determined by the ligand concentration, but that unexpectedly, the expression of many mesodermal targets of Activin/Nodal depends on rate of concentration increase. In addition, we use live imaging of hESCs with GFP integrated at the endogenous *SMAD4* locus to show that a stem cell model for the human embryo<sup>15</sup> generates a wave of Nodal signaling. Cells experience rapidly increasing Nodal specifically in the region of mesendoderm differentiation. We also demonstrate that pulsatile stimulation with Activin induces repeated strong signaling and enhances mesoderm differentiation. Our results break with the paradigm of concentration-dependent differentiation and demonstrate an important role for morphogen dynamics in the cell fate decisions associated with mammalian gastrulation. They suggest a highly dynamic picture of embryonic patterning where some cell fates depend on rapid concentration increase rather than absolute levels, and point to ligand dynamics as a new dimension to optimize protocols for directed stem cell differentiation.**

In the early mammalian embryo, BMP4 defines the dorsal-ventral axis while Nodal initially maintains the pluripotent epiblast and is subsequently required for mesoderm and endoderm differentiation. Expression patterns of these morphogens change significantly through gastrulation, which also involves large scale cell movements, and therefore individual cells experience rapidly changing morphogen levels during differentiation. To investigate how sudden increases in morphogen levels are interpreted by hESCs we focused on SMAD4, a shared component of the BMP and Nodal pathways (Fig. 1a) that translocates to the nucleus when the pathways are active. We performed live imaging of cells with GFP:SMAD4 in the endogenous locus<sup>16</sup>, and quantified signaling strength as the ratio of nuclear and cytoplasmic SMAD4 intensity (Extended Data Fig. 1a). We found that a sudden increase in BMP4 leads to sustained Smad4 signaling (Fig. 1b,c). In contrast, the response to addition of the Nodal substitute Activin is strongly adaptive, i.e. transient, and returns to a signaling baseline of around 20% of the response peak (Fig 1b,d), similar to the previously observed response to TGF $\beta$  in C2C12 cells<sup>17,18</sup>. The amplitude and baseline, but not the timescale of adaptation depended on the Activin dose (Extended data Fig 1b), while for BMP4 the dose affected the duration of signaling in a way consistent with ligand depletion at low doses (Extended data Fig 1c). Immunofluorescence staining for receptor-Smads revealed that SMAD1 activation follows the SMAD4 response to BMP4, while in response to Activin, SMAD2 nuclear localization adapts less than SMAD4 to about 60% of peak response (Extended data Fig. 1f-j).

Next, we evaluated transcriptional dynamics downstream of BMP4 and Activin using qPCR, which showed that BMP targets are stably induced (Fig. 2a), while differentiation targets of Nodal show adaptive transcription on a timescale consistent with SMAD4 signaling (Fig. 2b). Moreover, shared targets of the pathways were found to be transcribed adaptively in response to Activin and stably in response to BMP4 (Fig. 2c, Extended data Fig. 2a). In contrast, the transcription of *NODAL*, *WNT3*, and their inhibitors *LEFTY1* and *CER1* were sustained (Fig. 2d). The sustained transcription of these targets may reflect a requirement to activate the positive feedbacks between the Nodal and Wnt pathways, which are known to be involved in establishing the primitive streak, the region of the

mammalian embryo where mesoderm and endoderm form<sup>19</sup>. This suggests a picture where stable transcription of the ligands and inhibitors allows for the establishment of signaling patterns in the embryo while cells receiving these signals to differentiate interpret them according to their dynamics. Several other genes not related to mesendoderm differentiation were also found to be stably induced by Activin (Extended data Fig. 2b-d). Molecularly, the two classes of transcriptional dynamics may reflect differential requirements for SMAD4 signaling levels with lower levels required to maintain the targets with sustained dynamics, or SMAD4 independent transcription that depends only on SMAD2 activation, which is more sustained (Extended data Fig 1f-j). Because Nodal maintains epiblast pluripotency in combination with FGF<sup>20,21</sup> but induces primitive streak fates when Wnt is present, we then asked whether target genes respond adaptively to Nodal signaling during differentiation. Initial transcriptional response was found to be qualitatively similar with or without Wnt activation, although shared targets of Wnt and Activin such as the mesendodermal markers *EOMESODERMIN* (*EOMES*) and *BRACHYURY* (*BRA*) showed stronger response and could be stably reactivated following adaptation on longer time scales (Fig. 2e, Extended data Fig. 2e,f).

Sustained response to BMP4 suggests sensing of ligand concentration. In contrast, adaptive response to Activin with dose dependent amplitude suggests sensing of ligand rate of increase. We tested this by slowly raising Activin and BMP4 concentrations (concentration ramp) and comparing the response to these ramps with the response to a single step to the same final dose (Fig. 3a,d). If cells are primarily sensitive to ligand doses, the step and ramp should eventually approach the same final activity, while if cells are sensitive to the rate of ligand increase, the response to the ramp should be reduced. As expected, BMP4 signaling responses to the ramp and step approached each other as ramp concentration increased, while Activin signaling was dramatically reduced in the case of the ramp (Fig 3b,e). Moreover, transcriptional dynamics of the shared target *HAND1* matched the signaling pattern and showed dramatically reduced transcription in response to the Activin ramp. Similar results were obtained for other adaptive Activin targets, in contrast to non-adaptive Activin targets which as expected also showed sustained transcription in response to the ramp (Extended data Fig. 3).

Morphogens control cell fate and the dependence of transcription of mesodermal and endodermal genes on Activin rate of increase suggests rapid Activin increase may boost differentiation to these fates. We hypothesized that exposing cells to repeated rapid increases by pulsing the level of Activin could enhance this effect. To rigorously test this hypothesis, we compared pulses that switch between high and low doses of Activin with performing media changes at the same times but maintaining a high Activin dose (“dummy pulses”) (Fig. 4a). Each pulse of Activin elicited a strong response in the translocation of SMAD4 to the cell nucleus while no such responses were seen in response to the dummy pulses (Fig 4b). Differentiation to mesoderm and endoderm as marked by Bra expression was also enhanced under pulsed conditions (Fig. 4c,d), despite the reduced integrated ligand exposure. Continuous exposure to lower doses of Activin and treating cells with Activin for the same total time as the three pulses but in a single pulse showed that the effect is specific to pulsed Activin and not a consequence of simply reducing the integrated Activin exposure (Extended data 4).

To test whether rapid concentration increases are relevant to endogenous Nodal during embryonic patterning, we turned to micropatterned colonies of hESCs treated with BMP4. These colonies differentiate in a spatial pattern with reproducible rings of extraembryonic cells and all three germ layers, and represent a model for the patterning associated with gastrulation in the human embryo<sup>15,22</sup>. For the dynamics described here to be relevant, Nodal signaling should evolve rapidly compared to the timescale for adaptation. We used live imaging to observe SMAD4 signaling during the 42 hours in which these patterns form (Fig 4e-g). The cells initially respond uniformly to the

BMP4 treatment and this response is restricted to the colony edge by approximately 12 hours (Fig. 4e,f), after which a wave of increased nuclear SMAD4 spreads inward again from the edge (Fig. 4e,g). Because SMAD4 convolves the BMP and Nodal responses, we then looked at the pathway specific SMAD1 and SMAD2 (Fig 4 h-j). These showed that the BMP-specific active SMAD1 signaling remains restricted to the edge (Fig 4 j), while the Nodal transducer SMAD2 activity spreads rapidly inward from the colony edge between 24 and 36h (Fig 4i). Thus, both the SMAD2 and SMAD4 signal transducers reveal a rapidly evolving Nodal distribution with a wavefront that moves through the colony at approximately 1 cell diameter (10 $\mu$ m) per hour. Importantly, this wave of signaling activates Bra expression in its wake and the Bra-positive cells are restricted to the region of the colony with rapid increases in Nodal signaling (Fig. 4k,l). This indicates that rapid increases in endogenous Nodal signaling are associated with mesoderm differentiation in this model of human gastrulation.

Our work shows that morphogens in the mammalian embryo do not act in a purely concentration dependent manner and has revealed an important role for Activin/Nodal dynamics in specifying cell fate. Adaptive signaling could serve to restrict the response to a narrow competence window. Another possible function is the separation of distinct roles for the same morphogen by using distinct dynamics to selectively activate different target genes, effectively expanding the information content of the morphogen gradient<sup>23,24</sup>. It will be important to understand how our results fit with current protocols for directed stem cell differentiation which typically perform a single media change per day. The results presented here will serve as a basis for a dynamic understanding of embryonic patterning and stem cell differentiation.



**Figure 1. SMAD4 signaling response of hESCs to BMP4 is sustained while that to Activin is adaptive.** **a**, BMP and Nodal pathways share the signal transducer Smad4. **b**, GFP:SMAD4 average nuclear intensity after treatment with BMP4 (blue) or Activin (red). Error bars represent standard error. (Ncells~700). Distributions shown in Extended data Fig.1d-e. **c,d**, hESCs expressing GFP:SMAD4 at 0, 1 and 6 hours after treatment with BMP4 (**c**) or Activin (**d**). Scalebar 50 $\mu$ m.

**Figure 2. Transcription of BMP targets and Nodal differentiation targets reflects Smad4 dynamics, while other Nodal targets show sustained transcription.** **a, b**, qPCR measurements of transcriptional response to BMP4 treatment (**a**) and of differentiation targets to Activin (**b**), y-axes show relative C<sub>T</sub> values. **c**, Transcription of shared Activin/BMP4 target *HAND1* after BMP4 (blue) or Activin (red) treatment. **d**, Non-adaptive response to Activin of morphogens and inhibitors involved in initiating the primitive streak. **e**, Transcriptional response to Activin under pluripotency maintaining conditions (red) and mesendoderm differentiation conditions (blue) of Activin target *LHX1* (**e**) and joint Activin/Wnt target *EOMES* (**f**).

**Figure 3. BMP4 response reflects concentration, but Activin response reflects rate of concentration increase.** **a, d**, Ligand concentration over time for slow ramp (blue) or sudden step (red) in BMP4 (**a**) or Activin (**d**). **b, e**, SMAD4 signaling response to BMP4 (**b**) or Activin (**e**). **c, f**, Transcriptional response of *HAND1* to concentration ramp versus step for BMP4 (**c**) or Activin (**f**).

**Figure 4. Rapid increases in Activin/Nodal enhance mesoderm differentiation and occur endogenously during self-organized patterning.** **a**, Schematic of pulse experiment, graph shows ligand concentration, controls receive media changes at the same time as the pulsed well. **b**, SMAD4 signaling profile in response to Activin pulses (red), high Activin (yellow), and no Activin (blue). **c**, Immunofluorescence staining for BRA after high constant Activin or pulsed Activin. Scalebar 100 $\mu$ m. **d**, Distribution of BRA expression per cell (N<sub>cells</sub> per condition ~6 $\times$ 10<sup>3</sup>) in images containing (**c**). **e**, Average radial profile of SMAD4 signaling over time (kymograph) in micropatterned colonies after BMP4 treatment (N=4 colonies). **f**, SMAD4 signaling in single colony at 40h. **g**, Radial SMAD4 signaling profiles at discrete times from 20h to 40h. **h**, Immunofluorescence staining 40h after BMP4 treatment for pSMAD1, SMAD2/3 and BRA. **i,j,k** Normalized radial profiles of SMAD2/3 (**i**), pSMAD1 (**j**) and BRA (**k**) averaged over N>5 colonies per time. **l**, Half-maximum versus time for SMAD2/3 (blue), SMAD4 (purple) and pSMAD1 (red) over time and BRA expression domain defined by a threshold of at least 20% of maximal expression (yellow). In all figures error bars represent standard deviations taken over different colonies.

### Extended data figure 1.

**a**, Quantification of SMAD4 signaling as nuclear to cytoplasmic intensity ratio using automated segmentation of the nuclei. **b**, SMAD4 signaling response to different doses of Activin shows fixed time scale of adaptation. Doses in graph legend are in ng/ml. **c**, SMAD4 response to different doses of BMP4 shows decline at low doses with a dose dependent time scale, suggesting ligand depletion. **d**, Distribution of SMAD4 response to BMP4 at 0, 1, and 6 hours after treatment. **e**, Distribution of SMAD4 response to Activin at 0, 1, and 6 hours. **f**, pSMAD1 time course. **g**, SMAD2 immunofluorescence time course. Scalebar 50  $\mu\text{m}$ . **h**, Quantification of pSmad1 time course. **i**, Quantification of SMAD2 and SMAD4 nuclear signaling (nuclear to cytoplasmic ratio). Error bars represent standard error. Ncells per time $\sim 10^3$ . **j**, Quantification of SMAD2 time course, normalized so that the mean in SB431542 treated cells is zero and peak signaling is 1.

### Extended data figure 2.

**a**, Transcriptional response of *NOGGIN* to BMP4 (blue) and Activin (red) follows SMAD4 dynamics of respective pathways. **b-d**, Genes in several functional classes show non-adaptive transcriptional response to Activin. **b**, Non-cell fate related (TGF- $\beta$  targets). **c**, Differentiation genes, *MIXL1* is an exception and responds non-adaptively to Activin, *SOX17* does not respond in the pluripotent state. **d**, Pluripotency genes. **e** *CER1* is a non-adaptive target of Activin that behaves identically under under pluripotency (+FGF) and differentiation (+Wnt) conditions. **f**, Like *EOMES*, *BRA* response is enhanced under differentiation conditions but the dynamics are qualitatively similar.

### Extended data figure 3.

**a**, Transcription of *MIXL1*, a non-adaptive Activin target reaches the same levels after Activin ramp and step. **b,c**, Transcriptional response of *MESP1* (**b**) and *NOG* (**c**) to Activin ramp and step shows reduced transcription for ramp. **d**, Transcriptional response of *ID2* to BMP4 ramp and step.

### Extended data figure 4.

**a-c**, Comparison of BRA expression after single long pulse to 3 shorter pulses with same total time high or no Activin, demonstrating that effect of pulses is not simply due to reduced overall time in Activin. **a**, Schematic of the protocol. **b**, Immunofluorescence stainings for BRA. Scalebar 100 $\mu\text{m}$ . **c**, Distribution of BRA intensity per cell in images containing **b** ( $N_{\text{cells}}$  per condition  $\sim 6 \times 10^3$ ). **d,e**, Dose response series for showing BRA expression monotonically increases with Activin dose, demonstrating that effect of pulses is not due to reduced average Activin exposure. **d**, immunofluorescence staining for BRA after 34h differentiation with different doses of Activin. **e**, Distributions of BRA intensity per cell in the images containing (**d**). **f**, Cumulative distributions of BRA intensity.

## References

1. Wolpert, L. Positional information and the spatial pattern of cellular differentiation. *J. Theor. Biol.* **25**, 1–47 (1969).
2. Gurdon, J. B., Harger, P., Mitchell, A. & Lemaire, P. Activin signalling and response to a morphogen gradient. *Nature* **371**, 487–492 (1994).
3. Green, J. B., New, H. V. & Smith, J. C. Responses of embryonic *Xenopus* cells to activin and FGF are separated by multiple dose thresholds and correspond to distinct axes of the mesoderm. *Cell* **71**, 731–739 (1992).
4. Wilson, P. A., Lagna, G., Suzuki, A. & Hemmati-Brivanlou, A. Concentration-dependent patterning of the *Xenopus* ectoderm by BMP4 and its signal transducer Smad1. *Development* **124**, 3177–3184 (1997).
5. Loh, K. M. *et al.* Mapping the Pairwise Choices Leading from Pluripotency to Human Bone, Heart, and Other Mesoderm Cell Types. *Cell* **166**, 451–467 (2016).
6. Mendjan, S. *et al.* NANOG and CDX2 pattern distinct subtypes of human mesoderm during exit from pluripotency. *Cell Stem Cell* **15**, 310–325 (2014).
7. Chambers, S. M. *et al.* Highly efficient neural conversion of human ES and iPS cells by dual inhibition of SMAD signaling. *Nat. Biotechnol.* **27**, 275–280 (2009).
8. McLean, A. B. *et al.* Activin efficiently specifies definitive endoderm from human embryonic stem cells only when phosphatidylinositol 3-kinase signaling is suppressed. *Stem Cells* **25**, 29–38 (2007).
9. Arnold, S. J. & Robertson, E. J. Making a commitment: cell lineage allocation and axis patterning in the early mouse embryo. *Nat. Rev. Mol. Cell Biol.* **10**, 91–103 (2009).
10. Dubrulle, J. *et al.* Response to Nodal morphogen gradient is determined by the kinetics of target gene induction. *Elife* **4**, (2015).
11. van Boxtel, A. L. *et al.* A Temporal Window for Signal Activation Dictates the Dimensions of a Nodal Signaling Domain. *Dev. Cell* **35**, 175–185 (2015).
12. Kinder, S. J. *et al.* The organizer of the mouse gastrula is composed of a dynamic population of progenitor cells for the axial mesoderm. *Development* **128**, 3623–3634 (2001).
13. Winnier, G., Blessing, M., Labosky, P. A. & Hogan, B. L. Bone morphogenetic protein-4 is required for mesoderm formation and patterning in the mouse. *Genes Dev.* **9**, 2105–2116 (1995).
14. Zinski, J., Tajer, B. & Mullins, M. C. TGF- $\beta$  Family Signaling in Early Vertebrate Development. *Cold Spring Harb Perspect Biol* a033274–76 (2017). doi:10.1101/cshperspect.a033274
15. Warmflash, A., Sorre, B., Etoc, F., Siggia, E. D. & Brivanlou, A. H. A method to recapitulate early embryonic spatial patterning in human embryonic stem cells. *Nat. Methods* **11**, 847–854 (2014).
16. Nemashkalo, A., Ruzo, A., Heemskerk, I. & Warmflash, A. Morphogen and community effects determine cell fates in response to BMP4 signaling in human embryonic stem cells. *Development* (2017). doi:10.1242/dev.153239
17. Sorre, B., Warmflash, A., Brivanlou, A. H. & Siggia, E. D. Encoding of temporal signals by the TGF- $\beta$  pathway and implications for embryonic patterning. *Dev. Cell* **30**, 334–342 (2014).
18. Warmflash, A. *et al.* Dynamics of TGF- $\beta$  signaling reveal adaptive and pulsatile behaviors reflected in the nuclear localization of transcription factor Smad4. *Proceedings of the National Academy of Sciences* **109**, E1947–56 (2012).
19. Ben-Haim, N. *et al.* The nodal precursor acting via activin receptors induces mesoderm by maintaining a source of its convertases and BMP4. *Dev. Cell* **11**, 313–323 (2006).
20. Vallier, L., Alexander, M. & Pedersen, R. A. Activin/Nodal and FGF pathways cooperate to maintain pluripotency of human embryonic stem cells. *J. Cell. Sci.* **118**, 4495–4509 (2005).
21. James, D. TGF /activin/nodal signaling is necessary for the maintenance of pluripotency in

- human embryonic stem cells. *Development* **132**, 1273–1282 (2005).
22. Heemskerk, I. & Warmflash, A. Pluripotent stem cells as a model for embryonic patterning: From signaling dynamics to spatial organization in a dish. *Dev. Dyn.* (2016). doi:10.1002/dvdy.24432
  23. Levine, J. H., Lin, Y. & Elowitz, M. B. Functional roles of pulsing in genetic circuits. *Science* **342**, 1193–1200 (2013).
  24. Selimkhanov, J. *et al.* Accurate information transmission through dynamic biochemical signaling networks. *Science* **346**, 1370–1373 (2014).
  25. Sommer, C., Straehle, C., Kothe, U. & Hamprecht, F. A. Ilastik: Interactive learning and segmentation toolkit. in 230–233 (IEEE, 2011). doi:10.1109/ISBI.2011.5872394
  26. Deglincerti, A. *et al.* Self-organization of human embryonic stem cells on micropatterns. *Nat Protoc* **11**, 2223–2232 (2016).

## Methods

### Cell culture and differentiation protocols

The cell lines used were ESI017 (ESIBIO) and RUES2 GFP:Smad4 RFP:H2B (a gift of Ali Brivanlou, Rockefeller). These cell lines and their maintenance are described in<sup>16</sup>. For all experiments except micropatterning, cells were seeded at a low density of  $6 \times 10^4$  cells per  $\text{cm}^2$  and grown with rock-inhibitor Y27672 (10 $\mu$ M; StemCell Technologies). This ensured uniform response to exogenous ligand and minimized the effect of secondary endogenous signaling. Unless otherwise indicated in the figures, experiments in Fig.1-3 were done in mTeSR1 medium (StemCell Technologies) (also referred to as pluripotency conditions), and cells were treated with 50ng/ml Activin A (R&D Systems) or 50ng/ml BMP4 (R&D Systems). Differentiation conditions in Fig.2e are defined as Essential 6 medium (Gibco) + 3 $\mu$ M CHIR99021 (StemCell technologies).

### Imaging and image analysis

Live imaging was done on an Olympus/Andor spinning disk confocal microscope with a 40 $\times$ , NA 1.25 silicon oil objective. Immunofluorescence data for Fig.4c,d and extended data Fig.4a-e were collected using a 20 $\times$ , NA 0.75 objective on an Olympus IX83 inverted epifluorescence microscope. Fixed micropatterned colonies for Fig. 4h-k were imaged using an 30 $\times$  NA 1.05 silicon oil objective on an Olympus FV12 laser scanning confocal microscope. All image analysis used Ilastik<sup>25</sup> for initial segmentation and custom written Matlab code available on [github.com/idse/stemcells](https://github.com/idse/stemcells) for further analysis. Extended Fig.1a shows how Smad4 nuclear to cytoplasmic ratio, our measure for signaling intensity, is defined from the segmentation by subtracting the mean value in the background mask from nuclear and cytoplasmic masks for each cell.

### qPCR

qPCR experiments were done with ESI017 cells using standard methods. Below is a table of primers that were used.

|            |                          |                            |
|------------|--------------------------|----------------------------|
| ATP5O      | ACTCGGGTTTGACCTACAGC     | GGTACTGAAGCATCGCACCT       |
| BRA        | TGCTTCCCTGAGACCCAGTT     | GATCACTTCTTTTCTTTGCATCAAG  |
| CER        | ACAGTGCCCTTCAGCCAGACT    | ACAACACTTTTTTCACAGCCTTCGT  |
| GATA3      | TTCCTCCTCCAGAGTGTGGT     | AAAATGAACGGACAGAACCG       |
| HAND1      | GTGCGTCCTTTAATCCTCTTC    | GTGAGAGCAAGCGGAAAAG        |
| ID2        | GCAGCACCTCATCGACTACA     | AATTCAGAAGCCTGCAAGGA       |
| ID4        | CCCTCCCTCTCTAGTGCTCC     | GTGAACAAGCAGGGCGAC         |
| LEFTY1     | ACCTCAGGGACTATGGAGCTCAGG | AGAAATGGCCAATTGAAGGCCAGG   |
| LHX1       | TCCCCAATGGTCCCTTCTC      | CGTAGTACTCGCTCTGGTAATCTCC  |
| MIXL1      | CCGAGTCCAGGATCCAGGTA     | CTCTGACGCCGAGACTTGG        |
| NANOG      | CCGGTCAAGAAACAGAAGACCAGA | CCATTGCTATTCTTCGGCCAGTTG   |
| NODAL      | ATGCCAGATCCTCTTGTTGG     | AGACATCATCCGCAGCCTAC       |
| NOG        | CATGAAGCCTGGGTCTAGT      | TCGAACACCCAGACCCTATC       |
| OCT4       | GGGCTCTCCCATGCATTCAAAC   | CACCTTCCCTCCAACCAGTTGC     |
| SOX2       | CCATGCAGGTTGACACCGTTG    | TCGGCAGACTGATTCAAATAATACAG |
| TBR2/EOMES | CACATTGTAGTGGGCAGTGG     | CGCCACCAAACCTGAGATGAT      |
| WNT3       | CTCGCTGGCTACCCAATTT      | GAGCCCAGAGATGTGTACTGC      |

## Pulses

For pulse and dose response experiments in Fig.4 and extended data Fig.4 differentiation was done in Essential 6 medium + 1uM CHIR99021 + 20ng/ml bFGF (Life Technologies) + 10uM Y27672 with 30 ng/ml Activin added as indicated in the figures. Time between pulses was always 5 hours to allow the pathway to relax. Time of individual pulses was chosen for experimental convenience and lengths of pulses shown in Fig.4 are 6, 10, and 8 hours. Controls were subjected to media changes at the same time. During media changes cell were washed 3 times with PBS.

## Micropatterning

For micropatterned colonies we followed the protocol in<sup>26</sup> using the chemically defined medium mTeSR1. For fixed micropatterns we used the CYTOO Arena A chip and analyzed the 800um colonies, while for live imaging we used a CYTOO 96 well plate RW DS-S-A, which has 700um colonies. For the analysis in Fig.4, radial profiles of SMAD1 and SMAD2 were normalized to have the lowest signaling level be zero and the highest be one in at each time, as minimal and maximal levels were similar at each time and only their spatial distribution was changing. SMAD4 was normalized to have the maximum past position of the half-maximum of SMAD1 be one, as this reflects the peak of Nodal-dependent SMAD4 signaling. Finally, because BRA levels change substantially, BRA at all times was normalized to the maximum of the latest time (48h).

## Immunostaining

Fixing of cells and immunostaining of was done as described in<sup>16</sup>. Below is a table of antibodies that were used.

| Protein | Species | Dilution | Catalog No. | Vendor                    |
|---------|---------|----------|-------------|---------------------------|
| BRA     | Goat    | 1:400    | AF2085      | R&D Systems               |
| SOX2    | Rabbit  | 1:200    | 5024S       | Cell Signaling Technology |
| NANOG   | Mouse   | 1:400    | 560482      | BD Biosciences            |
| SMAD2/3 | Mouse   | 1:100    | 610842      | BD Biosciences            |
| pSMAD1  | Rabbit  | 1:100    | 13820       | Cell Signaling Technology |
| pSMAD2  | Rabbit  | 1:200    | 8828S       | Cell Signaling Technology |

## Data availability

Scripts used for analysis are available from [github.com/idse/stemcells](https://github.com/idse/stemcells). Data are available upon request.



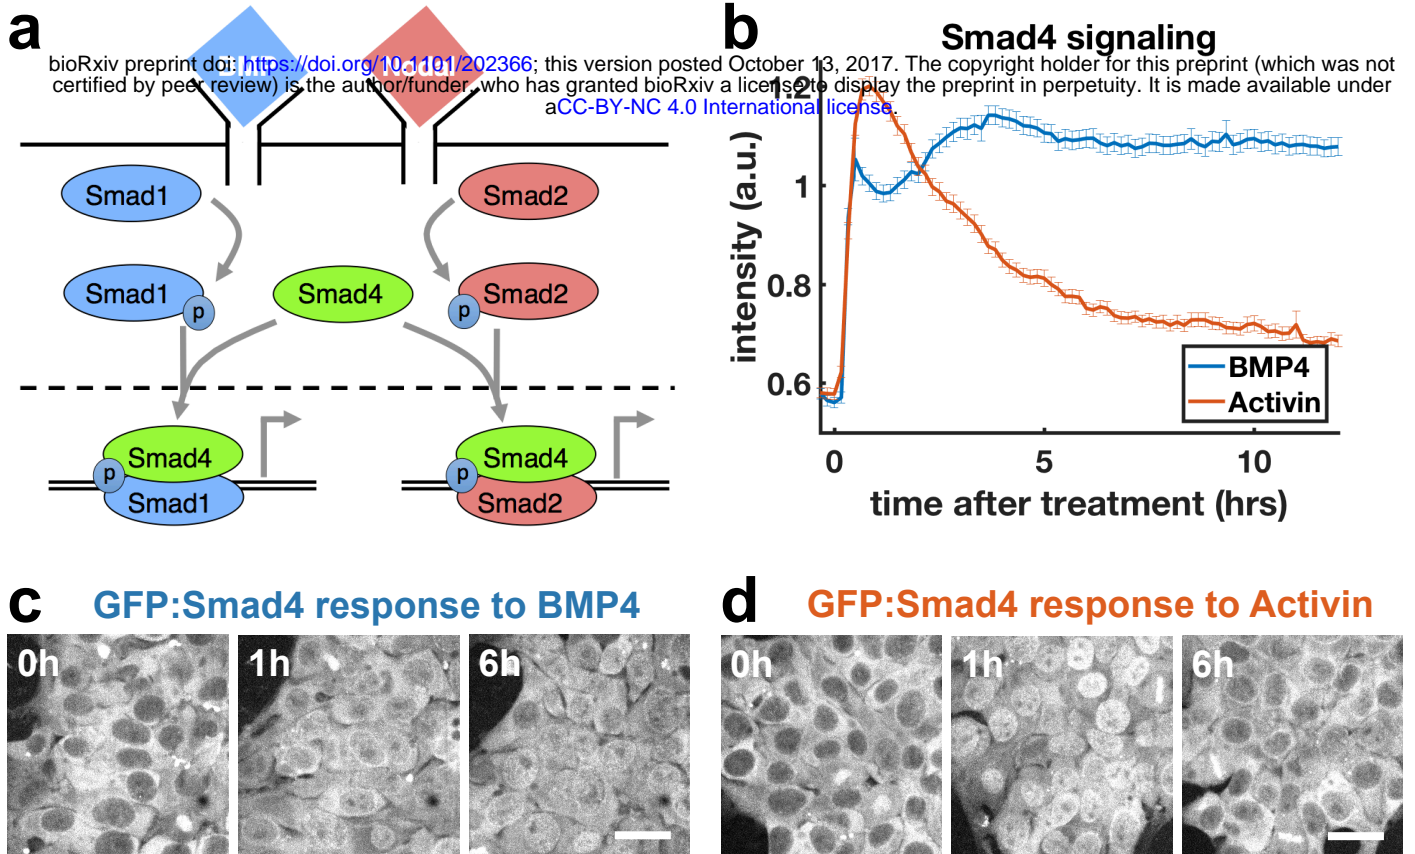

**Fig 1. Smad4 signaling response of hESCs to BMP4 is sustained while that to Activin is adaptive.**



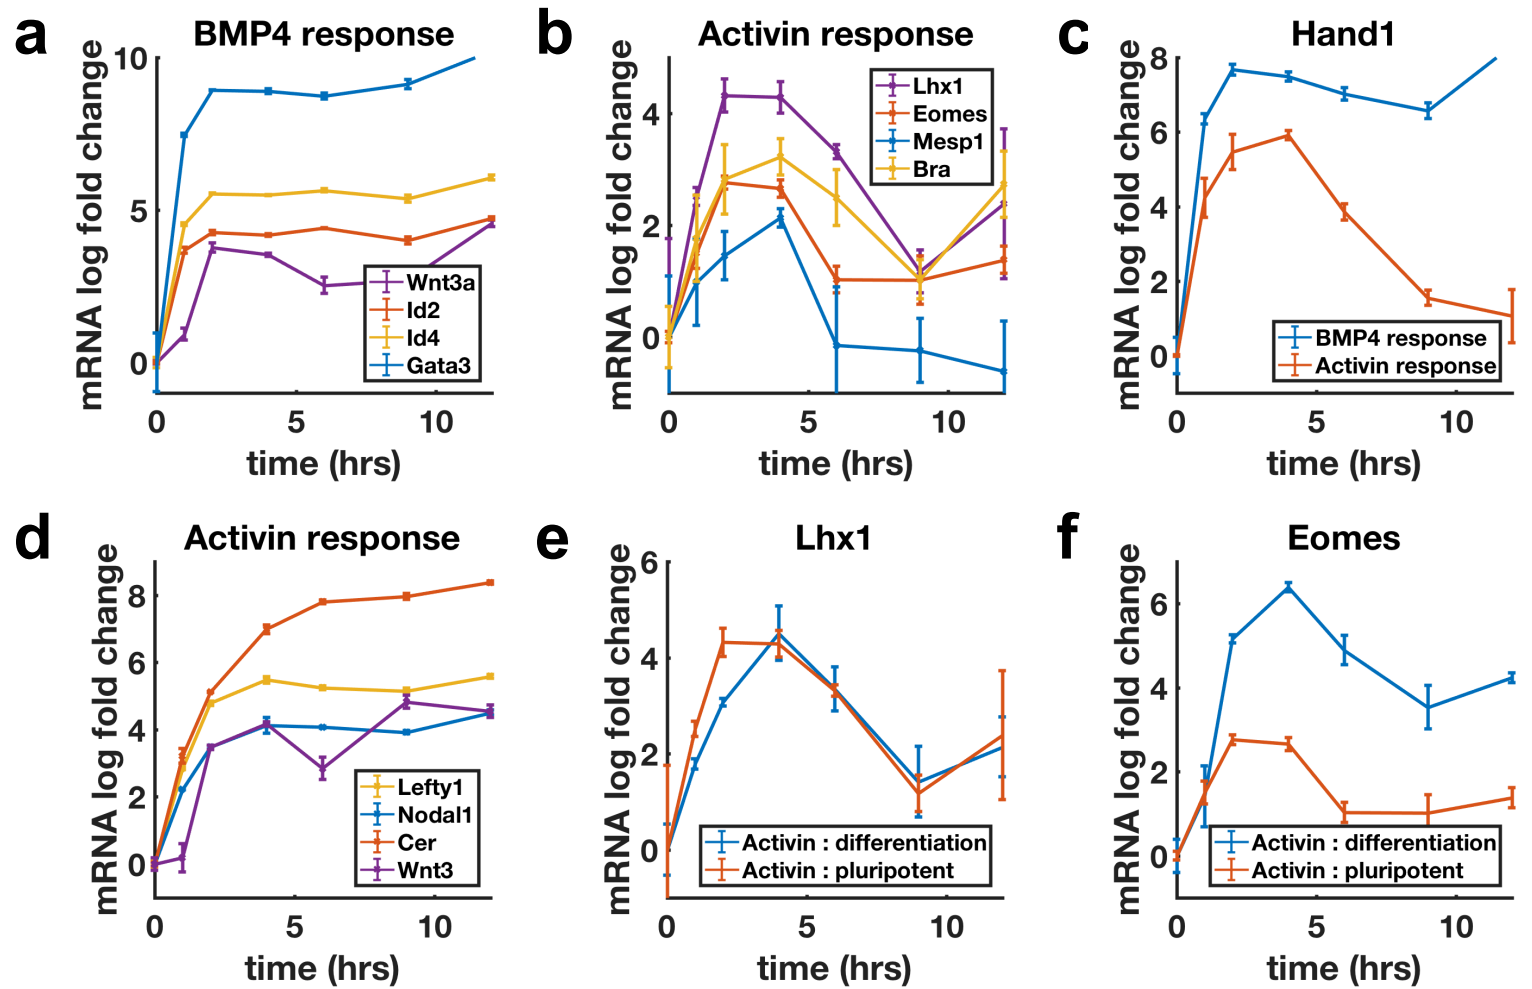

**Fig 2. Transcription of differentiation targets reflects Smad4, while other Nodal targets show sustained transcription that is independent of Smad4**

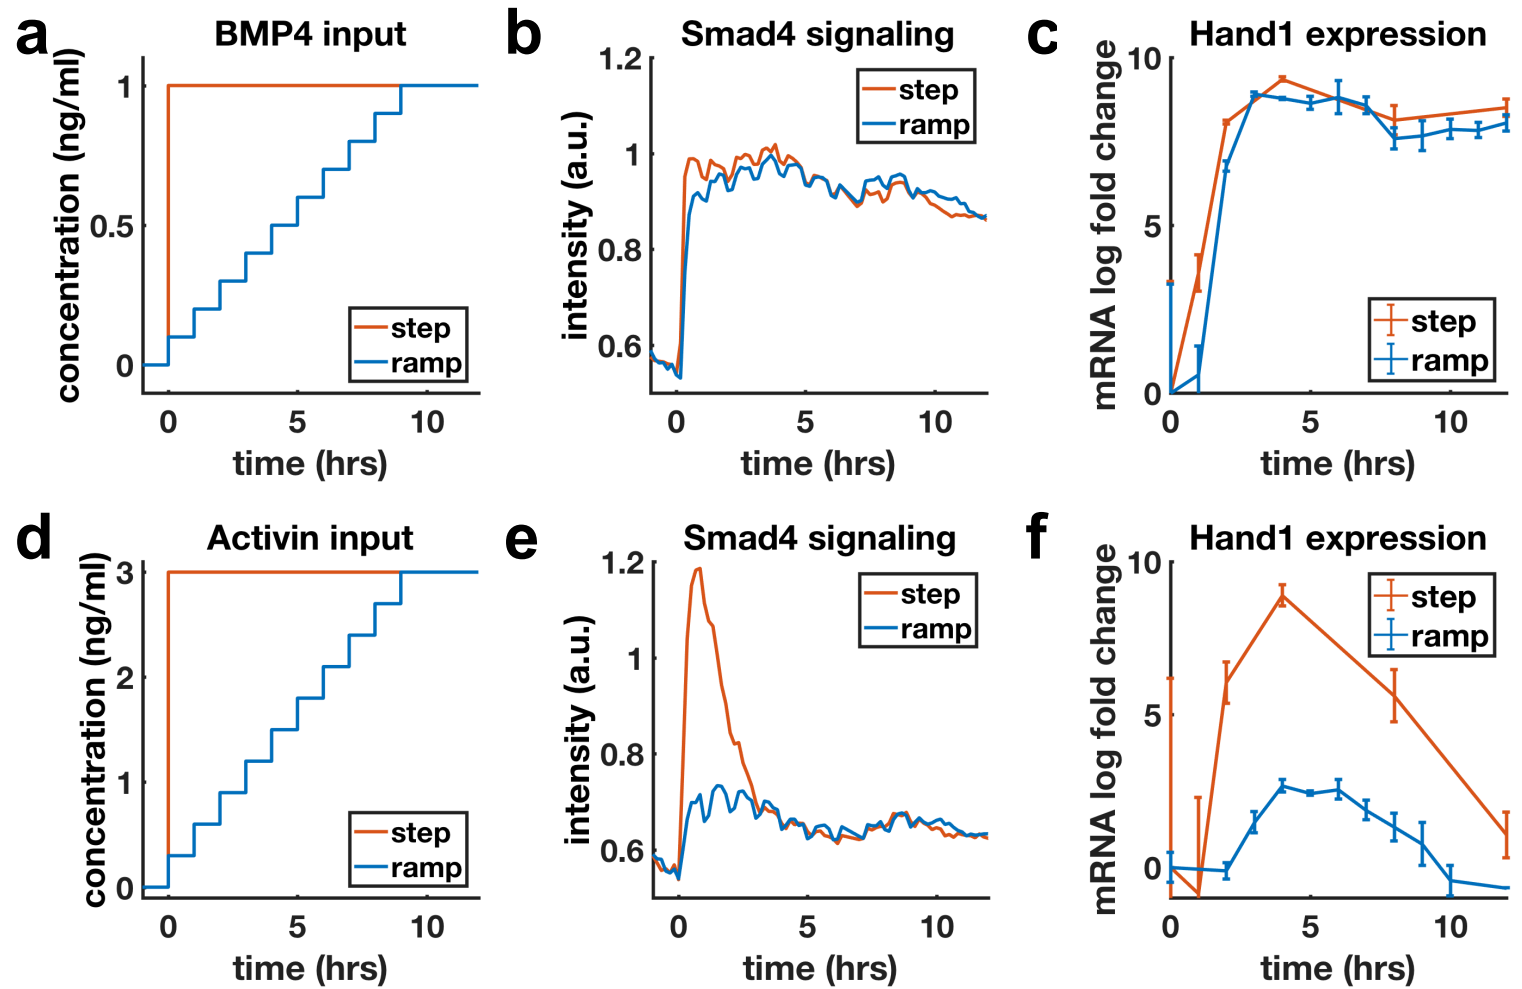

**Fig 3. BMP response reflects concentration, but Activin response reflects rate of concentration increase.**

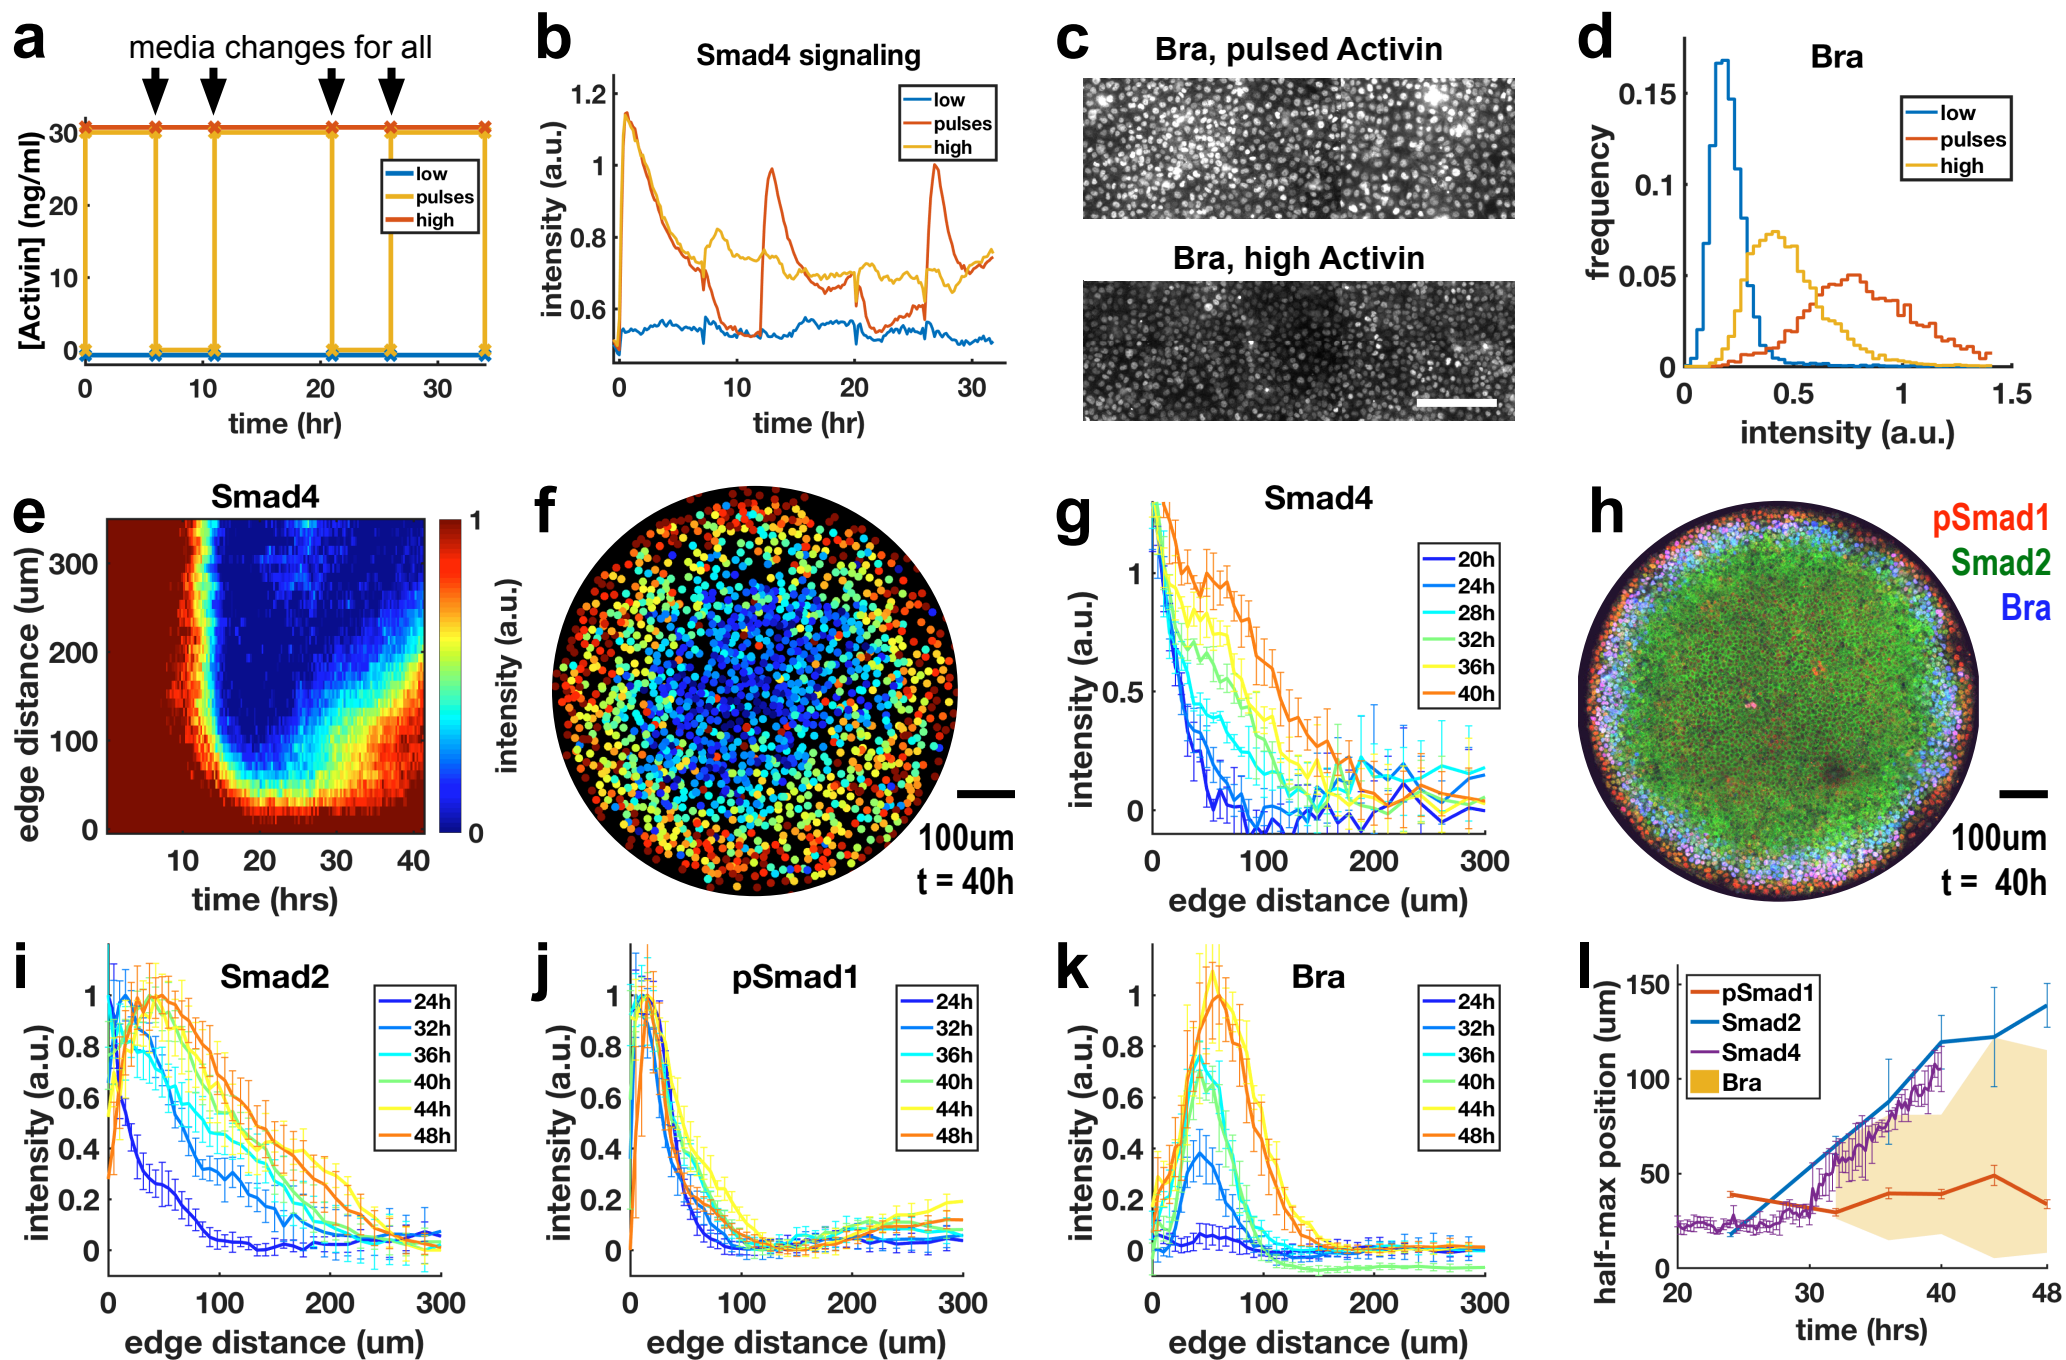

**Fig 4. Rapid increases in Activin/Nodal enhance mesoderm differentiation and occur endogenously during self-organized patterning.**

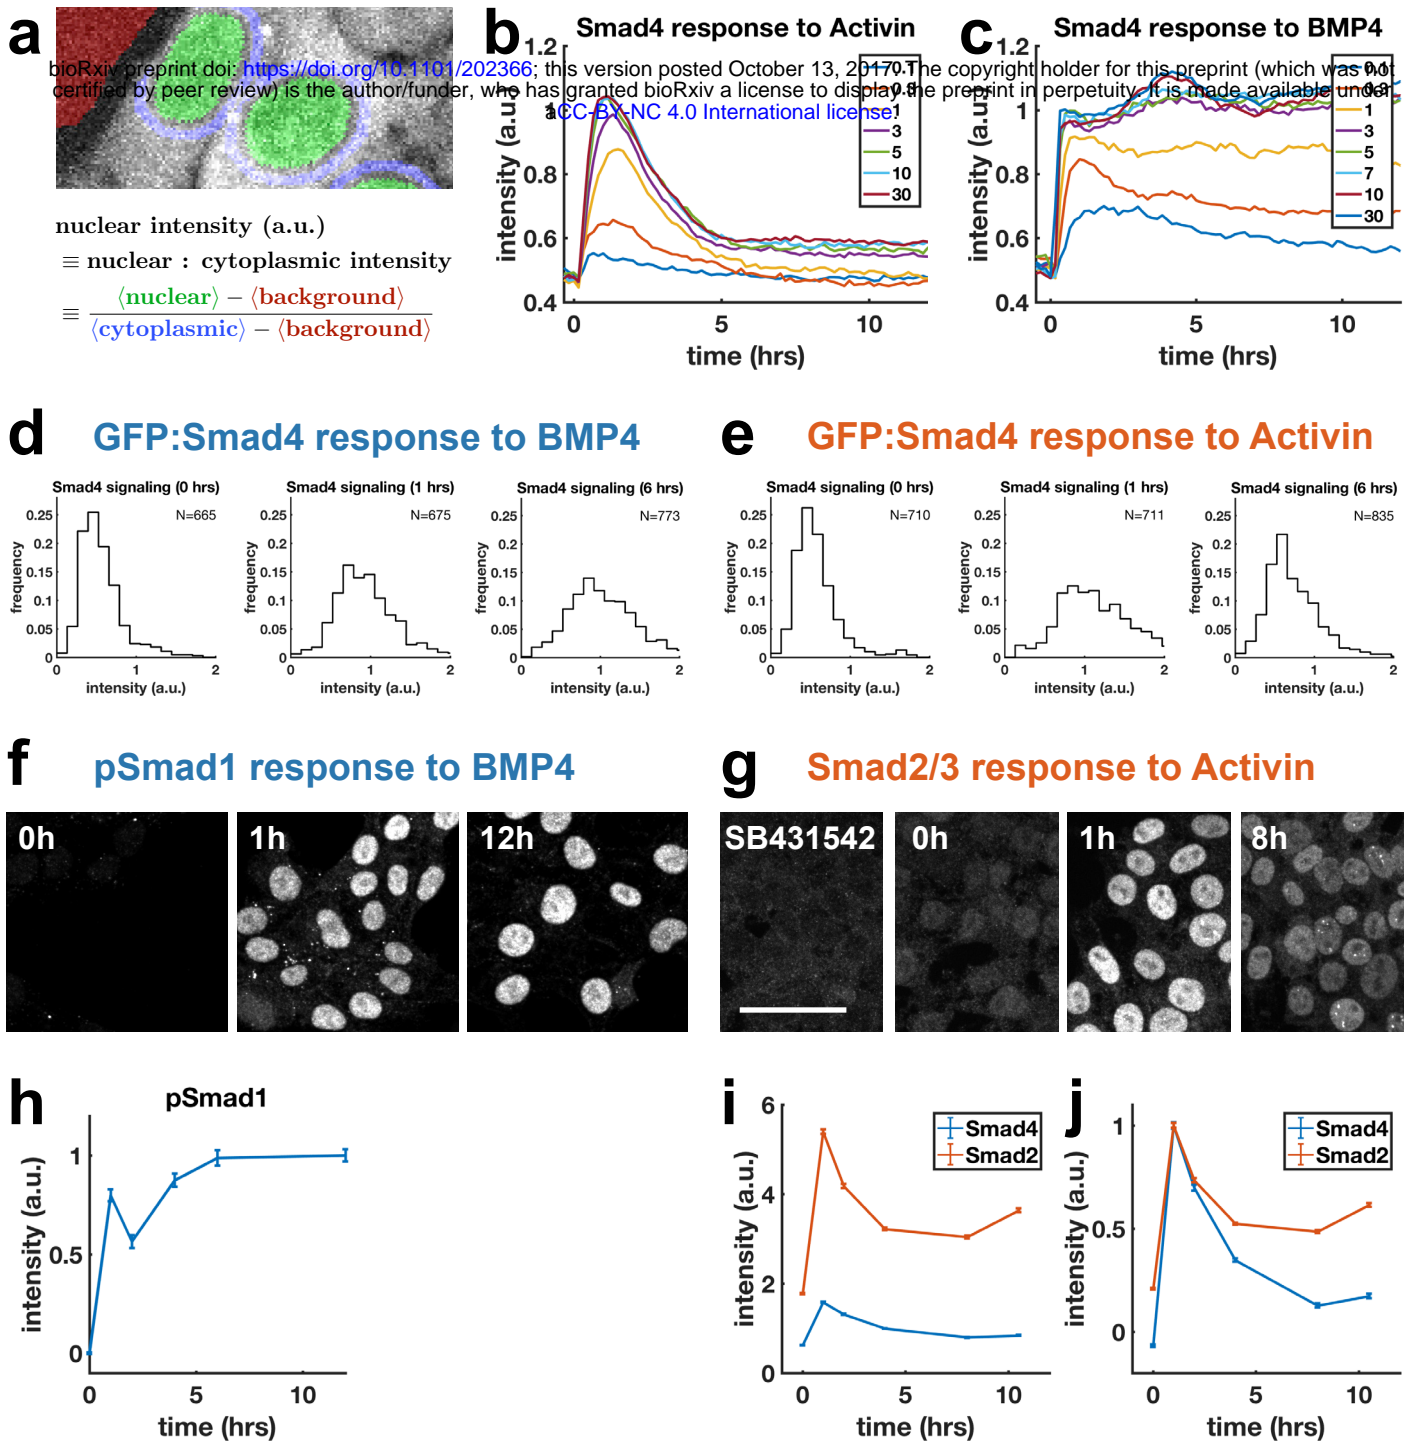

## Extended Data Fig 1.

Further characterization of response of hESCs to BMP4 and Activin.

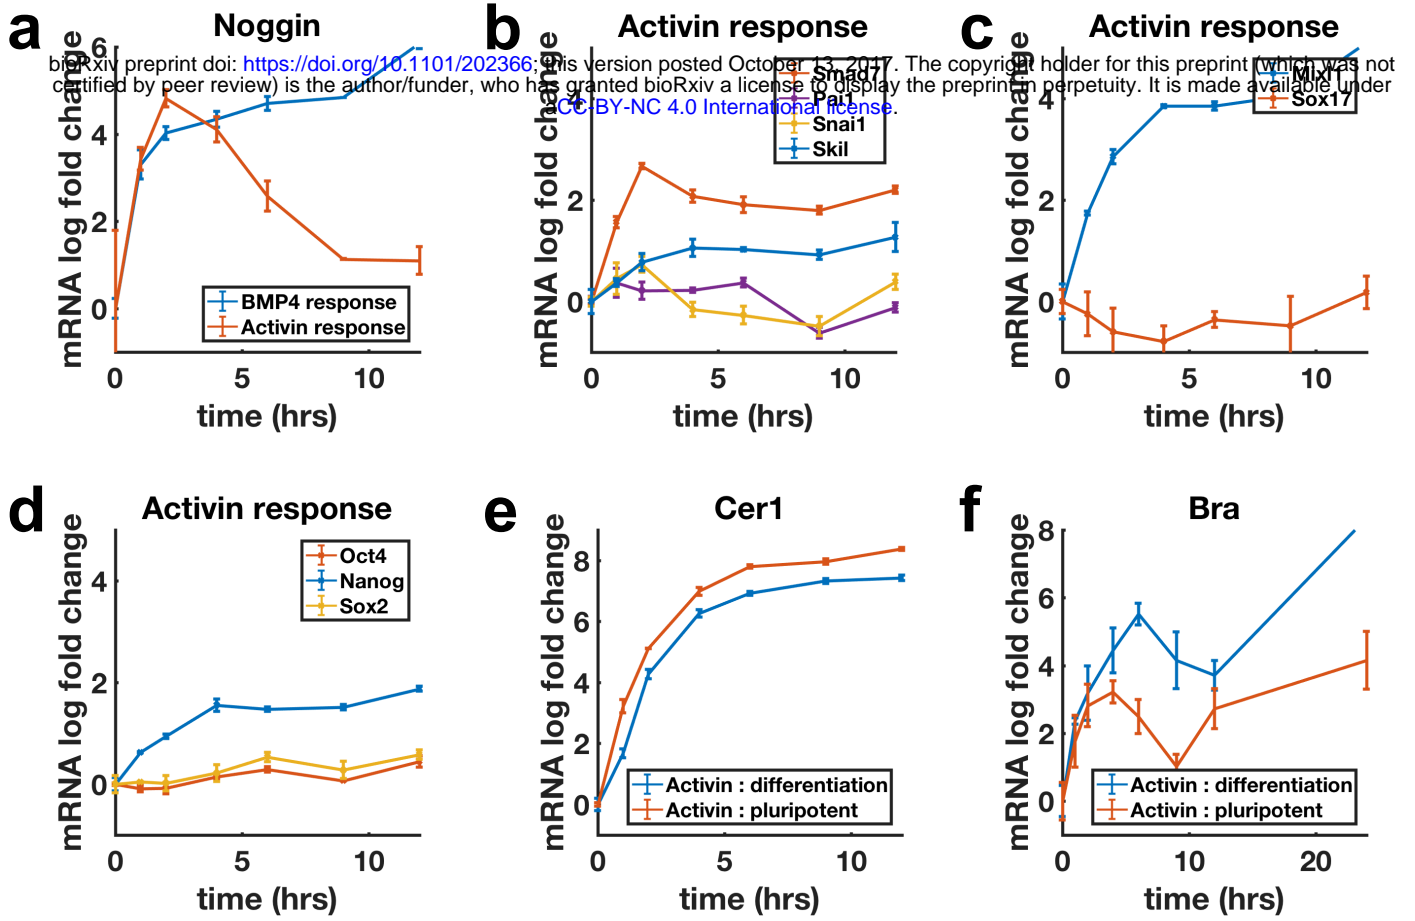

Extended Data Fig 2. Additional qPCR data.

## Activin response:

bioRxiv preprint doi: <https://doi.org/10.1101/202366>; this version posted October 13, 2017. The copyright holder for this preprint (which was not certified by peer review) is the author/funder, who has granted bioRxiv a license to display the preprint in perpetuity. It is made available under aCC-BY-NC 4.0 International license.

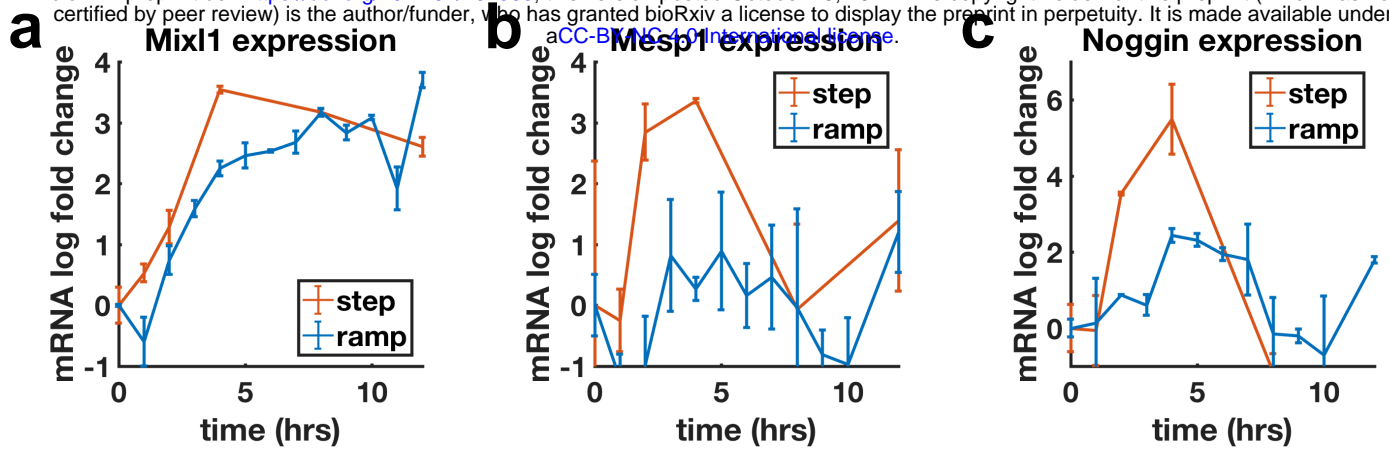

## BMP4 response:

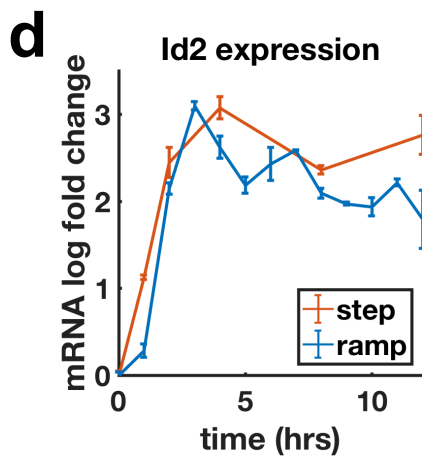

Extended Data Fig 3. Additional qPCR ramp data.



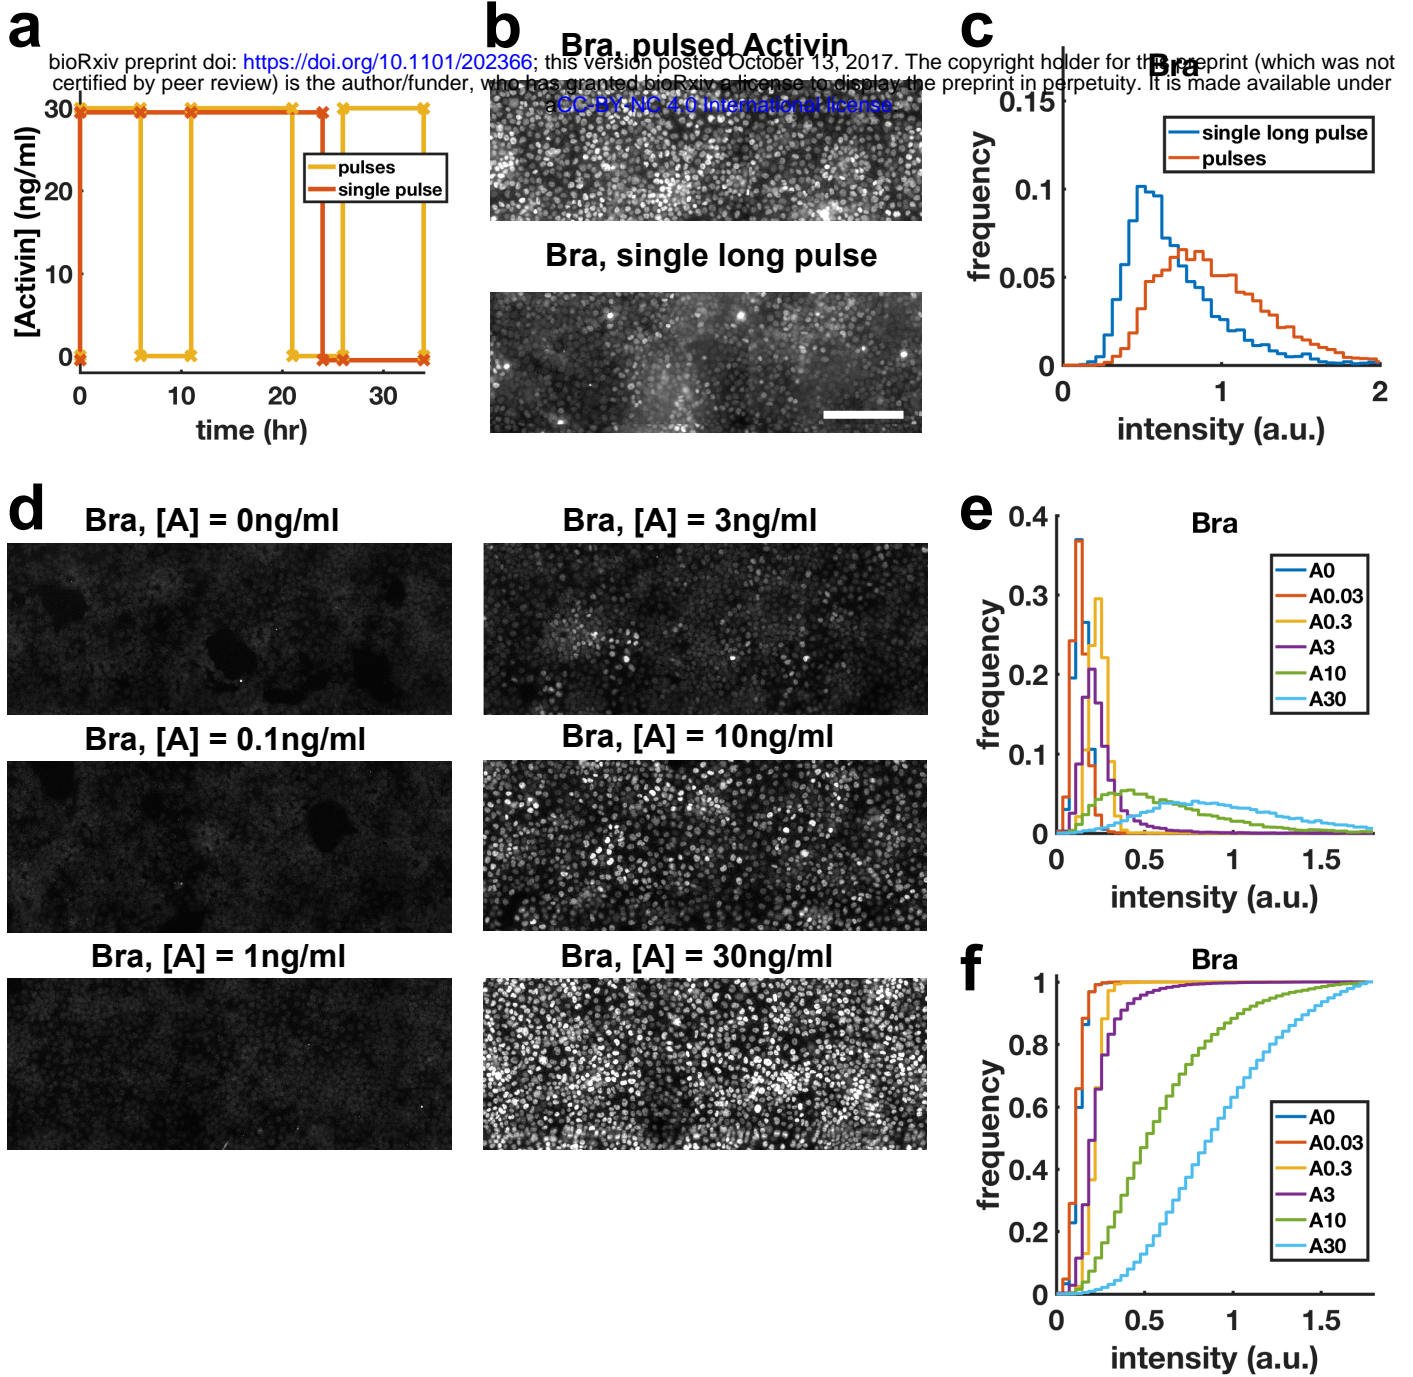

**Extended Data Fig 4. Increased Bra expression after pulsing is not due to reduced integrated exposure.**
